# Supplementary material for: Effects of different ablation points of renal denervation on the efficacy of resistant hypertension
Source: PeerJ journal article supplement (doi:10.7717/peerj.9842), 2020-09-15
Supplement: codebook.pdf [file codebook.pdf]

For all columns, "1" refers to "Yes", "0" refers to "No"
